# Supplementary material for: Trends and Costs of US Telehealth Use Among Patients With Cardiovascular Disease Before and During the COVID‐19 Pandemic
Source: PubMed Central journal article supplement — J Am Heart Assoc. 2023 Feb 15;12(4):e028713. doi: 10.1161/JAHA.122.028713 (PMC10111470; doi:10.1161/jaha.122.028713), 2023-02-15
Supplement: JAH3-12-e028713-s001.pdf [file JAH3-12-e028713-s001.pdf]

# **Supplemental Material**

**Table S1. The numbers of telehealth outpatient encounters per 100 patients with CVD by all and subsamples from January 2019 to June 2021 using the MarketScan® Commercial Claims and Encounters Database.**

| Month  | The number of telehealth outpatient encounters per 100 patients |            |            |                      |       |        |         |            |       |          |
|--------|-----------------------------------------------------------------|------------|------------|----------------------|-------|--------|---------|------------|-------|----------|
|        | All                                                             | Age Group  |            | P-value              | Sex   |        | P-value | Urbanicity |       | P-value  |
|        |                                                                 | Aged 18-34 | Aged 35-64 |                      | Male  | Female |         | Urban      | Rural |          |
| 19-Jan | 0.14                                                            | 0.22       | 0.13       | p=0.009 <sub>3</sub> | 0.10  | 0.18   | p<0.001 | 0.15       | 0.10  | p=0.0065 |
| 19-Feb | 0.13                                                            | 0.21       | 0.12       | p=0.005              | 0.09  | 0.18   | p<0.001 | 0.14       | 0.07  | p<0.001  |
| 19-Mar | 0.14                                                            | 0.24       | 0.12       | p<0.001              | 0.10  | 0.18   | p<0.001 | 0.14       | 0.10  | p=0.0154 |
| 19-Apr | 0.15                                                            | 0.31       | 0.14       | p<0.001              | 0.10  | 0.21   | p<0.001 | 0.16       | 0.10  | p=0.0049 |
| 19-May | 0.14                                                            | 0.28       | 0.13       | p<0.001              | 0.09  | 0.20   | p<0.001 | 0.15       | 0.09  | p=0.0014 |
| 19-Jun | 0.16                                                            | 0.32       | 0.14       | p<0.001              | 0.11  | 0.21   | p<0.001 | 0.16       | 0.17  | p=0.6303 |
| 19-Jul | 0.18                                                            | 0.40       | 0.16       | p<0.001              | 0.12  | 0.25   | p<0.001 | 0.19       | 0.17  | p=0.5354 |
| 19-Aug | 0.18                                                            | 0.42       | 0.16       | p<0.001              | 0.12  | 0.24   | p<0.001 | 0.18       | 0.18  | p=0.9523 |
| 19-Sep | 0.20                                                            | 0.42       | 0.17       | p<0.001              | 0.12  | 0.28   | p<0.001 | 0.20       | 0.21  | p=0.5760 |
| 19-Oct | 0.21                                                            | 0.43       | 0.18       | p<0.001              | 0.13  | 0.28   | p<0.001 | 0.20       | 0.21  | p=0.8572 |
| 19-Nov | 0.21                                                            | 0.43       | 0.19       | p<0.001              | 0.13  | 0.29   | p<0.001 | 0.21       | 0.22  | p=0.2481 |
| 19-Dec | 0.23                                                            | 0.39       | 0.22       | p<0.001              | 0.16  | 0.30   | p<0.001 | 0.24       | 0.21  | p=0.3460 |
| 20-Jan | 0.30                                                            | 0.65       | 0.26       | p<0.001              | 0.18  | 0.41   | p<0.001 | 0.30       | 0.24  | p=0.0295 |
| 20-Feb | 0.30                                                            | 0.52       | 0.27       | p<0.001              | 0.19  | 0.40   | p<0.001 | 0.31       | 0.23  | p=0.0046 |
| 20-Mar | 6.71                                                            | 8.88       | 6.47       | p<0.001              | 5.15  | 8.22   | p<0.001 | 7.17       | 3.70  | p<0.001  |
| 20-Apr | 25.38                                                           | 28.95      | 24.99      | p<0.001              | 20.02 | 30.59  | p<0.001 | 26.66      | 17.18 | p<0.001  |
| 20-May | 20.64                                                           | 24.91      | 20.14      | p<0.001              | 16.15 | 25.00  | p<0.001 | 21.90      | 12.56 | p<0.001  |
| 20-Jun | 16.98                                                           | 22.70      | 16.28      | p<0.001              | 12.83 | 21.02  | p<0.001 | 18.19      | 9.19  | p<0.001  |
| 20-Jul | 16.16                                                           | 23.02      | 15.39      | p<0.001              | 12.00 | 20.20  | p<0.001 | 17.30      | 8.79  | p<0.001  |
| 20-Aug | 14.47                                                           | 20.61      | 13.78      | p<0.001              | 10.73 | 18.10  | p<0.001 | 15.50      | 7.85  | p<0.001  |
| 20-Sep | 14.06                                                           | 21.24      | 13.27      | p<0.001              | 10.19 | 17.82  | p<0.001 | 15.11      | 7.28  | p<0.001  |
| 20-Oct | 13.95                                                           | 20.89      | 13.16      | p<0.001              | 10.06 | 17.73  | p<0.001 | 14.93      | 7.64  | p<0.001  |
| 20-Nov | 14.00                                                           | 20.56      | 13.25      | p<0.001              | 10.15 | 17.75  | p<0.001 | 14.91      | 8.16  | p<0.001  |
| 20-Dec | 16.77                                                           | 23.08      | 16.04      | p<0.001              | 12.53 | 20.90  | p<0.001 | 17.86      | 9.80  | p<0.001  |
| 21-Jan | 15.83                                                           | 22.56      | 15.03      | p<0.001              | 11.57 | 19.97  | p<0.001 | 16.85      | 9.24  | p<0.001  |
| 21-Feb | 14.44                                                           | 21.52      | 13.60      | p<0.001              | 10.47 | 18.30  | p<0.001 | 15.41      | 8.17  | p<0.001  |
| 21-Mar | 14.57                                                           | 22.41      | 13.63      | p<0.001              | 10.40 | 18.63  | p<0.001 | 15.68      | 7.44  | p<0.001  |
| 21-Apr | 12.57                                                           | 20.19      | 11.69      | p<0.001              | 9.01  | 16.03  | p<0.001 | 13.53      | 6.38  | p<0.001  |
| 21-May | 10.51                                                           | 17.35      | 9.70       | p<0.001              | 7.37  | 13.56  | p<0.001 | 11.30      | 5.41  | p<0.001  |
| 21-Jun | 8.95                                                            | 15.20      | 8.25       | p<0.001              | 6.20  | 11.62  | p<0.001 | 9.68       | 4.20  | p<0.001  |

|                                           |                |         |         |       |          |                  |       |         |         |       |          |
|-------------------------------------------|----------------|---------|---------|-------|----------|------------------|-------|---------|---------|-------|----------|
| Test difference between Feb-20 and Mar-20 | p<0.001        | p<0.001 | p<0.001 |       | p<0.001  | p<0.001          |       | p<0.001 | p<0.001 |       |          |
| Test difference between Mar-20 and Apr-20 | p<0.001        | p<0.001 | p<0.001 |       | p<0.001  | p<0.001          |       | p<0.001 | p<0.001 |       |          |
| Test difference between Apr-20 and May-20 | p<0.001        | p<0.001 | p<0.001 |       | p<0.001  | p<0.001          |       | p<0.001 | p<0.001 |       |          |
| Test difference between May-20 and Jun-20 | p<0.001        | p<0.001 | p<0.001 |       | p<0.001  | p<0.001          |       | p<0.001 | p<0.001 |       |          |
| Test difference between Feb-20 and Jun-21 | p<0.001        | p<0.001 | p<0.001 |       | p<0.001  | p<0.001          |       | p<0.001 | p<0.001 |       |          |
|                                           | Census regions |         |         |       |          | Sub-CVD Diseases |       |         |         |       |          |
| Month                                     | Northeast      | South   | Midwest | West  | P-value  | AMI              | HF    | IHD     | Stroke  | AF    | P-value  |
| 19-Jan                                    | 0.13           | 0.13    | 0.13    | 0.23  | p=0.0068 | 0.09             | 0.10  | 0.11    | 0.12    | 0.12  | p=0.9248 |
| 19-Feb                                    | 0.12           | 0.13    | 0.11    | 0.21  | p=0.0179 | 0.08             | 0.09  | 0.08    | 0.12    | 0.10  | p=0.6502 |
| 19-Mar                                    | 0.11           | 0.14    | 0.10    | 0.24  | p<0.001  | 0.10             | 0.11  | 0.09    | 0.14    | 0.11  | p=0.5189 |
| 19-Apr                                    | 0.11           | 0.15    | 0.10    | 0.35  | p<0.001  | 0.10             | 0.11  | 0.12    | 0.18    | 0.14  | p=0.6045 |
| 19-May                                    | 0.11           | 0.14    | 0.09    | 0.33  | p<0.001  | 0.20             | 0.12  | 0.12    | 0.14    | 0.16  | p=0.4969 |
| 19-Jun                                    | 0.17           | 0.17    | 0.09    | 0.27  | p<0.001  | 0.11             | 0.19  | 0.11    | 0.18    | 0.17  | p=0.2207 |
| 19-Jul                                    | 0.19           | 0.19    | 0.11    | 0.29  | p<0.001  | 0.14             | 0.16  | 0.13    | 0.18    | 0.19  | p=0.5181 |
| 19-Aug                                    | 0.17           | 0.20    | 0.11    | 0.27  | p<0.001  | 0.13             | 0.20  | 0.12    | 0.21    | 0.12  | p=0.0451 |
| 19-Sep                                    | 0.22           | 0.22    | 0.11    | 0.25  | p<0.001  | 0.13             | 0.19  | 0.13    | 0.24    | 0.17  | p=0.0439 |
| 19-Oct                                    | 0.18           | 0.22    | 0.13    | 0.36  | p<0.001  | 0.17             | 0.18  | 0.14    | 0.20    | 0.21  | p=0.3470 |
| 19-Nov                                    | 0.22           | 0.24    | 0.11    | 0.31  | p<0.001  | 0.22             | 0.20  | 0.18    | 0.19    | 0.14  | p=0.5365 |
| 19-Dec                                    | 0.28           | 0.25    | 0.11    | 0.38  | p<0.001  | 0.46             | 0.36  | 0.20    | 0.23    | 0.15  | p=0.0294 |
| 20-Jan                                    | 0.41           | 0.27    | 0.16    | 0.57  | p<0.001  | 0.17             | 0.16  | 0.21    | 0.35    | 0.23  | p=0.2163 |
| 20-Feb                                    | 0.37           | 0.29    | 0.17    | 0.53  | p<0.001  | 0.18             | 0.25  | 0.22    | 0.28    | 0.19  | p=0.1887 |
| 20-Mar                                    | 11.90          | 5.40    | 5.92    | 7.34  | p<0.001  | 6.22             | 7.87  | 6.36    | 7.85    | 6.25  | p<0.001  |
| 20-Apr                                    | 36.93          | 22.50   | 23.98   | 26.01 | p<0.001  | 25.92            | 34.08 | 26.20   | 31.25   | 25.98 | p<0.001  |
| 20-May                                    | 33.66          | 16.76   | 20.30   | 21.56 | p<0.001  | 20.25            | 27.05 | 20.43   | 25.73   | 21.17 | p<0.001  |
| 20-Jun                                    | 28.89          | 13.43   | 16.22   | 18.90 | p<0.001  | 15.13            | 20.64 | 15.71   | 20.91   | 16.14 | p<0.001  |
| 20-Jul                                    | 24.67          | 14.03   | 13.86   | 19.52 | p<0.001  | 13.98            | 19.74 | 14.87   | 19.84   | 14.68 | p<0.001  |
| 20-Aug                                    | 21.71          | 12.51   | 12.48   | 18.10 | p<0.001  | 11.99            | 16.95 | 13.04   | 18.13   | 13.13 | p<0.001  |
| 20-Sep                                    | 22.07          | 11.66   | 12.46   | 17.89 | p<0.001  | 11.31            | 16.44 | 12.38   | 17.20   | 12.99 | p<0.001  |
| 20-Oct                                    | 22.27          | 11.20   | 12.87   | 17.94 | p<0.001  | 11.02            | 15.54 | 12.21   | 16.78   | 12.82 | p<0.001  |
| 20-Nov                                    | 22.06          | 10.80   | 14.20   | 17.73 | p<0.001  | 11.57            | 15.17 | 12.05   | 16.12   | 12.74 | p<0.001  |
| 20-Dec                                    | 26.43          | 13.04   | 16.58   | 21.75 | p<0.001  | 14.26            | 18.33 | 14.94   | 19.30   | 16.06 | p<0.001  |

|                                           |         |         |         |         |         |         |         |         |         |         |         |
|-------------------------------------------|---------|---------|---------|---------|---------|---------|---------|---------|---------|---------|---------|
| 21-Jan                                    | 24.85   | 12.51   | 14.95   | 21.24   | p<0.001 | 12.46   | 18.00   | 14.06   | 18.00   | 14.43   | p<0.001 |
| 21-Feb                                    | 23.66   | 11.21   | 13.71   | 18.67   | p<0.001 | 12.12   | 16.54   | 12.54   | 16.65   | 13.13   | p<0.001 |
| 21-Mar                                    | 25.21   | 10.97   | 13.73   | 18.83   | p<0.001 | 11.04   | 15.59   | 12.08   | 16.80   | 12.66   | p<0.001 |
| 21-Apr                                    | 21.72   | 9.27    | 12.29   | 16.27   | p<0.001 | 9.93    | 13.22   | 10.17   | 14.49   | 10.88   | p<0.001 |
| 21-May                                    | 18.30   | 7.95    | 9.89    | 13.21   | p<0.001 | 7.51    | 11.47   | 8.60    | 11.83   | 8.83    | p<0.001 |
| 21-Jun                                    | 15.65   | 6.96    | 8.23    | 10.70   | p<0.001 | 6.64    | 9.30    | 7.32    | 10.67   | 7.37    | p<0.001 |
| Test difference between Feb-20 and Mar-20 | p<0.001 | p<0.001 | p<0.001 | p<0.001 |         | p<0.001 | p<0.001 | p<0.001 | p<0.001 | p<0.001 |         |
| Test difference between Mar-20 and Apr-20 | p<0.001 | p<0.001 | p<0.001 | p<0.001 |         | p<0.001 | p<0.001 | p<0.001 | p<0.001 | p<0.001 |         |
| Test difference between Apr-20 and May-20 | p<0.001 | p<0.001 | p<0.001 | p<0.001 |         | p<0.001 | p<0.001 | p<0.001 | p<0.001 | p<0.001 |         |
| Test difference between May-20 and Jun-20 | p<0.001 | p<0.001 | p<0.001 | p<0.001 |         | p<0.001 | p<0.001 | p<0.001 | p<0.001 | p<0.001 |         |
| Test difference between Feb-20 and Jun-21 | p<0.001 | p<0.001 | p<0.001 | p<0.001 |         | p<0.001 | p<0.001 | p<0.001 | p<0.001 | p<0.001 |         |

Abbreviation: CVD, cardiovascular disease; AMI, acute myocardial infarction; HF, heart failure; IHD, ischemic heart disease; AF, atrial fibrillation

Note: The numbers are the corresponding estimates for Figure 2. For age groups, sex, and urbanicity, the differences between the subgroups in the numbers of telehealth outpatient encounters were tested using Welch's 2-tail t-test by each month. For census regions (Northeast, South, Midwest, and West) and sub-CVD diseases (AMI, HF, IHD, stroke, and AF), the differences between the subgroups were tested using one-way ANOVA by each month. The corresponding p-values for the test statistics were reported on the columns right to the comparison groups. The month-to-month changes from February 2020 (the month before the pandemic) to June 2020, and the changes between February 2020 and June 2021 were tested using Welch's 2-tail t-test for all and the subgroups. The corresponding p-values for the test statistics were reported at the bottom of each panel.

**Table S2. The numbers of in-person outpatient encounters per 100 patients with CVD by all and subsamples from January 2019 to June 2021 using the MarketScan® Commercial Claims and Encounters Database.**

| Month  | The number of in-person outpatient encounters per 100 patients |            |            |         |        |        |         |            |        |          |
|--------|----------------------------------------------------------------|------------|------------|---------|--------|--------|---------|------------|--------|----------|
|        | All                                                            | Age Group  |            | P-value | Sex    |        | P-value | Urbanicity |        | P-value  |
|        |                                                                | Aged 18-34 | Aged 35-64 |         | Male   | Female |         | Urban      | Rural  |          |
| 19-Jan | 328.00                                                         | 259.29     | 336.02     | p<0.001 | 296.81 | 358.33 | p<0.001 | 329.72     | 316.95 | p<0.001  |
| 19-Feb | 296.42                                                         | 224.17     | 305.08     | p<0.001 | 267.53 | 324.52 | p<0.001 | 297.94     | 286.68 | p<0.001  |
| 19-Mar | 309.07                                                         | 234.68     | 317.93     | p<0.001 | 275.91 | 341.32 | p<0.001 | 310.77     | 298.12 | p<0.001  |
| 19-Apr | 319.03                                                         | 236.69     | 329.00     | p<0.001 | 282.25 | 354.79 | p<0.001 | 320.31     | 310.79 | p=0.0013 |
| 19-May | 319.36                                                         | 239.71     | 328.92     | p<0.001 | 284.14 | 353.60 | p<0.001 | 320.78     | 310.17 | p<0.001  |
| 19-Jun | 295.38                                                         | 219.63     | 304.06     | p<0.001 | 260.05 | 329.75 | p<0.001 | 296.44     | 288.61 | p<0.0056 |
| 19-Jul | 313.89                                                         | 233.85     | 322.72     | p<0.001 | 277.30 | 349.48 | p<0.001 | 314.67     | 308.84 | p=0.0383 |
| 19-Aug | 314.53                                                         | 233.26     | 323.43     | p<0.001 | 282.23 | 345.95 | p<0.001 | 314.79     | 312.87 | p=0.5130 |
| 19-Sep | 309.11                                                         | 222.56     | 320.13     | p<0.001 | 276.11 | 341.21 | p<0.001 | 310.37     | 301.02 | p<0.001  |
| 19-Oct | 364.29                                                         | 255.91     | 377.60     | p<0.001 | 323.01 | 404.44 | p<0.001 | 365.11     | 359.00 | p=0.0029 |
| 19-Nov | 316.99                                                         | 225.00     | 328.17     | p<0.001 | 281.79 | 351.23 | p<0.001 | 318.11     | 309.83 | p<0.001  |
| 19-Dec | 330.53                                                         | 226.51     | 342.82     | p<0.001 | 298.64 | 361.55 | p<0.001 | 330.94     | 327.90 | p=0.3098 |
| 20-Jan | 322.67                                                         | 236.51     | 333.04     | p<0.001 | 291.11 | 353.38 | p<0.001 | 323.70     | 316.10 | p=0.0075 |
| 20-Feb | 298.90                                                         | 214.36     | 309.46     | p<0.001 | 269.40 | 327.59 | p<0.001 | 300.17     | 290.74 | p<0.001  |
| 20-Mar | 248.45                                                         | 180.21     | 256.94     | p<0.001 | 229.29 | 267.09 | p<0.001 | 248.38     | 248.91 | p=0.8348 |
| 20-Apr | 145.73                                                         | 109.35     | 150.51     | p<0.001 | 142.96 | 148.42 | p<0.001 | 144.12     | 156.04 | p<0.001  |
| 20-May | 203.47                                                         | 144.78     | 210.78     | p<0.001 | 190.37 | 216.22 | p<0.001 | 200.77     | 220.87 | p<0.001  |
| 20-Jun | 276.49                                                         | 187.74     | 286.73     | p<0.001 | 249.27 | 302.95 | p<0.001 | 274.51     | 289.23 | p<0.001  |
| 20-Jul | 286.50                                                         | 197.71     | 296.51     | p<0.001 | 258.11 | 314.11 | p<0.001 | 285.11     | 295.39 | p<0.001  |
| 20-Aug | 282.99                                                         | 195.68     | 293.30     | p<0.001 | 256.26 | 308.98 | p<0.001 | 281.42     | 293.08 | p<0.001  |
| 20-Sep | 308.11                                                         | 207.49     | 320.74     | p<0.001 | 279.79 | 335.65 | p<0.001 | 308.50     | 305.56 | p=0.3071 |
| 20-Oct | 332.16                                                         | 224.19     | 345.80     | p<0.001 | 299.84 | 363.59 | p<0.001 | 331.82     | 334.33 | p=0.4134 |
| 20-Nov | 296.55                                                         | 195.21     | 309.21     | p<0.001 | 266.86 | 325.42 | p<0.001 | 295.77     | 301.54 | p=0.0483 |
| 20-Dec | 317.92                                                         | 206.21     | 331.37     | p<0.001 | 289.72 | 345.35 | p<0.001 | 317.24     | 322.31 | p=0.0990 |
| 21-Jan | 277.30                                                         | 189.31     | 287.88     | p<0.001 | 254.15 | 299.82 | p<0.001 | 276.62     | 281.72 | p=0.0648 |
| 21-Feb | 272.73                                                         | 181.06     | 284.33     | p<0.001 | 250.56 | 294.29 | p<0.001 | 272.50     | 274.16 | p=0.5419 |
| 21-Mar | 340.04                                                         | 224.54     | 354.68     | p<0.001 | 310.27 | 369.00 | p<0.001 | 338.71     | 348.62 | p=0.0022 |
| 21-Apr | 317.01                                                         | 215.99     | 330.01     | p<0.001 | 289.95 | 343.32 | p<0.001 | 316.49     | 320.31 | p=0.1911 |
| 21-May | 281.88                                                         | 184.70     | 293.78     | p<0.001 | 257.97 | 305.14 | p<0.001 | 280.84     | 288.60 | p=0.0065 |
| 21-Jun | 263.24                                                         | 165.54     | 275.05     | p<0.001 | 234.62 | 291.08 | p<0.001 | 262.19     | 270.01 | p=0.0033 |

|                                           |                |         |         |        |          |                  |        |         |         |        |         |
|-------------------------------------------|----------------|---------|---------|--------|----------|------------------|--------|---------|---------|--------|---------|
| Test difference between Feb-20 and Mar-20 | p<0.001        | p<0.001 | p<0.001 |        | p<0.001  | p<0.001          |        | p<0.001 | p<0.001 |        |         |
| Test difference between Mar-20 and Apr-20 | p<0.001        | p<0.001 | p<0.001 |        | p<0.001  | p<0.001          |        | p<0.001 | p<0.001 |        |         |
| Test difference between Apr-20 and May-20 | p<0.001        | p<0.001 | p<0.001 |        | p<0.001  | p<0.001          |        | p<0.001 | p<0.001 |        |         |
| Test difference between May-20 and Jun-20 | p<0.001        | p<0.001 | p<0.001 |        | p<0.001  | p<0.001          |        | p<0.001 | p<0.001 |        |         |
| Test difference between Feb-20 and Jun-21 | p<0.001        | p<0.001 | p<0.001 |        | p<0.001  | p<0.001          |        | p<0.001 | p<0.001 |        |         |
|                                           | Census regions |         |         |        |          | Sub-CVD Diseases |        |         |         |        |         |
| Month                                     | Northeast      | South   | Midwest | West   | P-value  | AMI              | HF     | IHD     | Stroke  | AF     | P-value |
| 19-Jan                                    | 330.91         | 327.66  | 332.15  | 317.08 | p=0.0013 | 418.51           | 604.87 | 379.64  | 455.51  | 416.99 | p<0.001 |
| 19-Feb                                    | 288.46         | 298.77  | 304.57  | 279.12 | p<0.001  | 369.85           | 550.52 | 344.28  | 407.95  | 373.46 | p<0.001 |
| 19-Mar                                    | 313.65         | 306.56  | 318.04  | 295.87 | p<0.001  | 382.57           | 568.24 | 357.75  | 425.09  | 385.96 | p<0.001 |
| 19-Apr                                    | 317.48         | 316.91  | 331.92  | 304.13 | p<0.001  | 398.16           | 584.47 | 371.95  | 432.84  | 392.62 | p<0.001 |
| 19-May                                    | 321.15         | 318.79  | 327.60  | 301.99 | p<0.001  | 387.72           | 584.54 | 372.70  | 431.38  | 395.56 | p<0.001 |
| 19-Jun                                    | 293.47         | 297.14  | 299.12  | 281.77 | p<0.001  | 345.96           | 539.82 | 340.83  | 397.98  | 371.15 | p<0.001 |
| 19-Jul                                    | 305.48         | 319.19  | 316.49  | 295.15 | p<0.001  | 362.49           | 568.76 | 360.69  | 417.06  | 393.24 | p<0.001 |
| 19-Aug                                    | 299.65         | 317.99  | 322.16  | 302.93 | p<0.001  | 375.21           | 577.41 | 365.79  | 420.05  | 389.20 | p<0.001 |
| 19-Sep                                    | 313.09         | 305.98  | 320.69  | 293.58 | p<0.001  | 360.22           | 550.42 | 359.19  | 404.94  | 389.27 | p<0.001 |
| 19-Oct                                    | 366.21         | 363.40  | 374.93  | 342.03 | p<0.001  | 413.72           | 636.40 | 424.74  | 472.39  | 456.08 | p<0.001 |
| 19-Nov                                    | 315.38         | 316.99  | 327.26  | 297.25 | p<0.001  | 352.30           | 557.69 | 367.09  | 406.51  | 394.27 | p<0.001 |
| 19-Dec                                    | 316.43         | 333.92  | 340.40  | 313.87 | p<0.001  | 369.01           | 577.42 | 384.39  | 420.49  | 422.11 | p<0.001 |
| 20-Jan                                    | 324.86         | 321.47  | 335.14  | 298.50 | p<0.001  | 360.35           | 568.93 | 373.36  | 412.57  | 405.44 | p<0.001 |
| 20-Feb                                    | 294.68         | 299.89  | 310.49  | 274.70 | p<0.001  | 343.49           | 533.70 | 350.19  | 386.57  | 366.29 | p<0.001 |
| 20-Mar                                    | 224.44         | 258.37  | 250.00  | 232.17 | p<0.001  | 299.20           | 488.75 | 297.33  | 322.48  | 307.62 | p<0.001 |
| 20-Apr                                    | 109.30         | 160.21  | 135.37  | 151.37 | p<0.001  | 202.19           | 355.62 | 186.80  | 206.42  | 191.98 | p<0.001 |
| 20-May                                    | 153.45         | 222.92  | 196.01  | 198.02 | p<0.001  | 260.08           | 426.96 | 253.76  | 270.78  | 261.89 | p<0.001 |
| 20-Jun                                    | 234.49         | 291.66  | 281.42  | 252.68 | p<0.001  | 326.40           | 517.56 | 329.16  | 361.54  | 348.52 | p<0.001 |
| 20-Jul                                    | 261.08         | 294.68  | 297.34  | 260.09 | p<0.001  | 337.44           | 530.77 | 341.47  | 365.08  | 356.46 | p<0.001 |
| 20-Aug                                    | 257.85         | 289.72  | 297.86  | 254.00 | p<0.001  | 329.12           | 526.46 | 339.40  | 359.45  | 358.54 | p<0.001 |
| 20-Sep                                    | 295.35         | 312.19  | 321.63  | 277.30 | p<0.001  | 367.93           | 557.17 | 366.70  | 390.29  | 385.11 | p<0.001 |
| 20-Oct                                    | 321.92         | 336.60  | 342.81  | 301.99 | p<0.001  | 385.40           | 588.58 | 391.37  | 417.01  | 409.84 | p<0.001 |
| 20-Nov                                    | 282.11         | 304.54  | 300.35  | 269.96 | p<0.001  | 346.84           | 524.51 | 347.31  | 373.10  | 366.99 | p<0.001 |

|                                           |         |         |         |         |         |         |         |         |         |         |         |
|-------------------------------------------|---------|---------|---------|---------|---------|---------|---------|---------|---------|---------|---------|
| 20-Dec                                    | 288.53  | 331.00  | 323.39  | 284.93  | p<0.001 | 370.50  | 556.96  | 376.40  | 395.56  | 402.11  | p<0.001 |
| 21-Jan                                    | 269.44  | 282.21  | 286.05  | 245.19  | p<0.001 | 325.30  | 509.01  | 332.23  | 344.76  | 346.62  | p<0.001 |
| 21-Feb                                    | 254.17  | 277.14  | 284.95  | 251.13  | p<0.001 | 327.90  | 496.35  | 326.55  | 347.27  | 335.76  | p<0.001 |
| 21-Mar                                    | 329.97  | 345.83  | 352.14  | 299.28  | p<0.001 | 384.09  | 597.14  | 401.60  | 423.20  | 416.11  | p<0.001 |
| 21-Apr                                    | 308.81  | 319.69  | 331.27  | 284.57  | p<0.001 | 364.67  | 571.75  | 377.97  | 393.20  | 386.59  | p<0.001 |
| 21-May                                    | 270.62  | 291.81  | 285.33  | 242.12  | p<0.001 | 337.28  | 524.71  | 339.01  | 354.52  | 353.86  | p<0.001 |
| 21-Jun                                    | 248.24  | 281.67  | 253.09  | 217.23  | p<0.001 | 299.85  | 461.14  | 308.82  | 329.93  | 325.86  | p<0.001 |
| Test difference between Feb-20 and Mar-20 | p<0.001 | p<0.001 | p<0.001 | p<0.001 |         | p<0.001 | p<0.001 | p<0.001 | p<0.001 | p<0.001 |         |
| Test difference between Mar-20 and Apr-20 | p<0.001 | p<0.001 | p<0.001 | p<0.001 |         | p<0.001 | p<0.001 | p<0.001 | p<0.001 | p<0.001 |         |
| Test difference between Apr-20 and May-20 | p<0.001 | p<0.001 | p<0.001 | p<0.001 |         | p<0.001 | p<0.001 | p<0.001 | p<0.001 | p<0.001 |         |
| Test difference between May-20 and Jun-20 | p<0.001 | p<0.001 | p<0.001 | p<0.001 |         | p<0.001 | p<0.001 | p<0.001 | p<0.001 | p<0.001 |         |
| Test difference between Feb-20 and Jun-21 | p<0.001 | p<0.001 | p<0.001 | p<0.001 |         | p<0.001 | p<0.001 | p<0.001 | p<0.001 | p<0.001 |         |

Abbreviation: CVD, cardiovascular disease; AMI, acute myocardial infarction; HF, heart failure; IHD, ischemic heart disease; AF, atrial fibrillation

Note: The numbers are the corresponding estimates for Figure 2. For age groups, sex, and urbanicity, the differences between the subgroups in the numbers of in-person outpatient encounters were tested using Welch's 2-tail t-test by each month. For census regions (Northeast, South, Midwest, and West) and sub-CVD diseases (AMI, HF, IHD, stroke, and AF), the differences between the subgroups were tested using one-way ANOVA by each month. The corresponding p-values for the test statistics were reported on the columns right to the comparison groups. The month-to-month changes from February 2020 (the month before the pandemic) to June 2020, and the changes between February 2020 and June 2021 were tested using Welch's 2-tail t-test for all and the subgroups. The corresponding p-values for the test statistics were reported at the bottom of each panel.

**Table S3. The proportion of telehealth to total outpatient encounters by all and subsamples from January 2019 to June 2021 using the MarketScan® Commercial Claims and Encounters Database.**

| Month  | The proportion of telehealth to total outpatient encounters, % |            |            |          |       |        |          |            |       |          |
|--------|----------------------------------------------------------------|------------|------------|----------|-------|--------|----------|------------|-------|----------|
|        | All                                                            | Age Group  |            | P-value  | Sex   |        | P-value  | Urbanicity |       | P-value  |
|        |                                                                | Aged 18-34 | Aged 35-64 |          | Male  | Female |          | Urban      | Rural |          |
| 19-Jan | 0.04                                                           | 0.09       | 0.04       | p=0.0046 | 0.03  | 0.05   | p=0.0198 | 0.05       | 0.03  | p=0.0528 |
| 19-Feb | 0.05                                                           | 0.09       | 0.04       | p=0.0003 | 0.03  | 0.06   | p=0.0012 | 0.05       | 0.02  | p=0.0170 |
| 19-Mar | 0.04                                                           | 0.10       | 0.04       | p<0.001  | 0.03  | 0.05   | p=0.0185 | 0.05       | 0.03  | p=0.0588 |
| 19-Apr | 0.05                                                           | 0.13       | 0.04       | p<0.001  | 0.03  | 0.06   | p=0.0041 | 0.05       | 0.03  | p=0.0062 |
| 19-May | 0.05                                                           | 0.12       | 0.04       | p<0.001  | 0.03  | 0.06   | p=0.0010 | 0.05       | 0.03  | p=0.0834 |
| 19-Jun | 0.05                                                           | 0.14       | 0.05       | p<0.001  | 0.04  | 0.06   | p=0.0031 | 0.05       | 0.06  | p=0.4145 |
| 19-Jul | 0.06                                                           | 0.17       | 0.05       | p<0.001  | 0.04  | 0.07   | p<0.001  | 0.06       | 0.06  | p=0.7320 |
| 19-Aug | 0.06                                                           | 0.18       | 0.05       | p<0.001  | 0.04  | 0.07   | p=0.0017 | 0.06       | 0.06  | p=0.6227 |
| 19-Sep | 0.06                                                           | 0.19       | 0.05       | p<0.001  | 0.04  | 0.08   | p<0.001  | 0.06       | 0.07  | p=0.9390 |
| 19-Oct | 0.06                                                           | 0.17       | 0.05       | p<0.001  | 0.04  | 0.07   | p<0.001  | 0.06       | 0.06  | p=0.1097 |
| 19-Nov | 0.07                                                           | 0.19       | 0.06       | p<0.001  | 0.05  | 0.08   | p<0.001  | 0.07       | 0.07  | p=0.5923 |
| 19-Dec | 0.07                                                           | 0.17       | 0.06       | p<0.001  | 0.05  | 0.08   | p<0.001  | 0.07       | 0.06  | p=0.3543 |
| 20-Jan | 0.09                                                           | 0.27       | 0.08       | p<0.001  | 0.06  | 0.11   | p<0.001  | 0.09       | 0.08  | p=0.0516 |
| 20-Feb | 0.10                                                           | 0.24       | 0.09       | p<0.001  | 0.07  | 0.12   | p<0.001  | 0.10       | 0.08  | p=0.1751 |
| 20-Mar | 2.63                                                           | 4.70       | 2.46       | p<0.001  | 2.20  | 2.99   | p<0.001  | 2.81       | 1.46  | p<0.001  |
| 20-Apr | 14.83                                                          | 20.94      | 14.24      | p<0.001  | 12.29 | 17.09  | p<0.001  | 15.61      | 9.92  | p<0.001  |
| 20-May | 9.21                                                           | 14.68      | 8.72       | p<0.001  | 7.82  | 10.37  | p<0.001  | 9.83       | 5.38  | p<0.001  |
| 20-Jun | 5.79                                                           | 10.79      | 5.37       | p<0.001  | 4.90  | 6.49   | p<0.001  | 6.22       | 3.08  | p<0.001  |
| 20-Jul | 5.34                                                           | 10.43      | 4.93       | p<0.001  | 4.44  | 6.04   | p<0.001  | 5.72       | 2.89  | p<0.001  |
| 20-Aug | 4.86                                                           | 9.53       | 4.49       | p<0.001  | 4.02  | 5.53   | p<0.001  | 5.22       | 2.61  | p<0.001  |
| 20-Sep | 4.36                                                           | 9.29       | 3.97       | p<0.001  | 3.51  | 5.04   | p<0.001  | 4.67       | 2.33  | p<0.001  |
| 20-Oct | 4.03                                                           | 8.52       | 3.67       | p<0.001  | 3.25  | 4.65   | p<0.001  | 4.31       | 2.23  | p<0.001  |
| 20-Nov | 4.51                                                           | 9.53       | 4.11       | p<0.001  | 3.66  | 5.17   | p<0.001  | 4.80       | 2.63  | p<0.001  |
| 20-Dec | 5.01                                                           | 10.06      | 4.62       | p<0.001  | 4.15  | 5.71   | p<0.001  | 5.33       | 2.95  | p<0.001  |
| 21-Jan | 5.40                                                           | 10.65      | 4.96       | p<0.001  | 4.35  | 6.24   | p<0.001  | 5.74       | 3.18  | p<0.001  |
| 21-Feb | 5.03                                                           | 10.62      | 4.56       | p<0.001  | 4.01  | 5.85   | p<0.001  | 5.35       | 2.89  | p<0.001  |
| 21-Mar | 4.11                                                           | 9.08       | 3.70       | p<0.001  | 3.24  | 4.81   | p<0.001  | 4.42       | 2.09  | p<0.001  |
| 21-Apr | 3.81                                                           | 8.55       | 3.42       | p<0.001  | 3.01  | 4.46   | p<0.001  | 4.10       | 1.95  | p<0.001  |
| 21-May | 3.59                                                           | 8.59       | 3.20       | p<0.001  | 2.78  | 4.26   | p<0.001  | 3.87       | 1.84  | p<0.001  |
| 21-Jun | 3.29                                                           | 8.41       | 2.91       | p<0.001  | 2.57  | 3.84   | p<0.001  | 3.56       | 1.53  | p<0.001  |



|                                           |                |         |         |       |          |                  |      |         |         |       |          |
|-------------------------------------------|----------------|---------|---------|-------|----------|------------------|------|---------|---------|-------|----------|
| Test difference between Feb-20 and Mar-20 | p<0.001        | p<0.001 | p<0.001 |       | p<0.001  | p<0.001          |      | p<0.001 | p<0.001 |       |          |
| Test difference between Mar-20 and Apr-20 | p<0.001        | p<0.001 | p<0.001 |       | p<0.001  | p<0.001          |      | p<0.001 | p<0.001 |       |          |
| Test difference between Apr-20 and May-20 | p<0.001        | p<0.001 | p<0.001 |       | p<0.001  | p<0.001          |      | p<0.001 | p<0.001 |       |          |
| Test difference between May-20 and Jun-20 | p<0.001        | p<0.001 | p<0.001 |       | p<0.001  | p<0.001          |      | p<0.001 | p<0.001 |       |          |
| Test difference between Feb-20 and Jun-21 | p<0.001        | p<0.001 | p<0.001 |       | p<0.001  | p<0.001          |      | p<0.001 | p<0.001 |       |          |
|                                           | Census regions |         |         |       |          | Sub-CVD Diseases |      |         |         |       |          |
| Month                                     | Northeast      | South   | Midwest | West  | P-value  | AMI              | HF   | IHD     | Stroke  | AF    | P-value  |
| 19-Jan                                    | 0.04           | 0.04    | 0.04    | 0.07  | p=0.0258 | 0.02             | 0.02 | 0.03    | 0.03    | 0.03  | p=0.8582 |
| 19-Feb                                    | 0.04           | 0.04    | 0.04    | 0.08  | p=0.0041 | 0.02             | 0.02 | 0.02    | 0.03    | 0.03  | p=0.3495 |
| 19-Mar                                    | 0.04           | 0.05    | 0.03    | 0.08  | p<0.001  | 0.02             | 0.02 | 0.03    | 0.03    | 0.03  | p=0.2411 |
| 19-Apr                                    | 0.03           | 0.05    | 0.03    | 0.12  | p<0.001  | 0.03             | 0.02 | 0.03    | 0.04    | 0.04  | p=0.0574 |
| 19-May                                    | 0.04           | 0.04    | 0.03    | 0.11  | p<0.001  | 0.05             | 0.02 | 0.03    | 0.03    | 0.04  | p=0.9030 |
| 19-Jun                                    | 0.06           | 0.06    | 0.03    | 0.10  | p<0.001  | 0.03             | 0.03 | 0.03    | 0.04    | 0.04  | p=0.7946 |
| 19-Jul                                    | 0.06           | 0.06    | 0.04    | 0.10  | p<0.001  | 0.04             | 0.03 | 0.04    | 0.04    | 0.05  | p=0.7391 |
| 19-Aug                                    | 0.06           | 0.06    | 0.03    | 0.09  | p<0.001  | 0.03             | 0.03 | 0.03    | 0.05    | 0.03  | p=0.5067 |
| 19-Sep                                    | 0.07           | 0.07    | 0.03    | 0.09  | p<0.001  | 0.04             | 0.03 | 0.04    | 0.06    | 0.04  | p=0.3498 |
| 19-Oct                                    | 0.05           | 0.06    | 0.04    | 0.11  | p<0.001  | 0.04             | 0.03 | 0.03    | 0.04    | 0.05  | p=0.4107 |
| 19-Nov                                    | 0.07           | 0.08    | 0.03    | 0.10  | p<0.001  | 0.06             | 0.04 | 0.05    | 0.05    | 0.04  | p=0.4443 |
| 19-Dec                                    | 0.09           | 0.07    | 0.03    | 0.12  | p<0.001  | 0.12             | 0.06 | 0.05    | 0.05    | 0.04  | p=0.2298 |
| 20-Jan                                    | 0.13           | 0.08    | 0.05    | 0.19  | p<0.001  | 0.05             | 0.03 | 0.06    | 0.09    | 0.06  | p=0.8801 |
| 20-Feb                                    | 0.12           | 0.10    | 0.05    | 0.19  | p<0.001  | 0.05             | 0.05 | 0.06    | 0.07    | 0.05  | p=0.5142 |
| 20-Mar                                    | 5.04           | 2.05    | 2.31    | 3.06  | p<0.001  | 2.04             | 1.58 | 2.09    | 2.38    | 1.99  | p=0.0032 |
| 20-Apr                                    | 25.26          | 12.31   | 15.05   | 14.66 | p<0.001  | 11.36            | 8.74 | 12.30   | 13.15   | 11.92 | p<0.001  |
| 20-May                                    | 17.99          | 6.99    | 9.38    | 9.82  | p<0.001  | 7.22             | 5.96 | 7.45    | 8.68    | 7.48  | p<0.001  |
| 20-Jun                                    | 10.97          | 4.40    | 5.45    | 6.96  | p<0.001  | 4.43             | 3.84 | 4.55    | 5.47    | 4.43  | p<0.001  |
| 20-Jul                                    | 8.63           | 4.54    | 4.46    | 6.98  | p<0.001  | 3.98             | 3.59 | 4.17    | 5.15    | 3.95  | p<0.001  |
| 20-Aug                                    | 7.76           | 4.14    | 4.02    | 6.65  | p<0.001  | 3.51             | 3.12 | 3.70    | 4.80    | 3.53  | p<0.001  |
| 20-Sep                                    | 6.95           | 3.60    | 3.73    | 6.06  | p<0.001  | 2.98             | 2.87 | 3.26    | 4.22    | 3.26  | p<0.001  |
| 20-Oct                                    | 6.47           | 3.22    | 3.62    | 5.61  | p<0.001  | 2.78             | 2.57 | 3.03    | 3.87    | 3.03  | p<0.001  |
| 20-Nov                                    | 7.25           | 3.42    | 4.52    | 6.16  | p<0.001  | 3.23             | 2.81 | 3.35    | 4.14    | 3.35  | p<0.001  |
| 20-Dec                                    | 8.39           | 3.79    | 4.88    | 7.09  | p<0.001  | 3.70             | 3.19 | 3.82    | 4.65    | 3.84  | p<0.001  |

|                                           |         |         |         |         |         |         |         |         |         |         |         |
|-------------------------------------------|---------|---------|---------|---------|---------|---------|---------|---------|---------|---------|---------|
| 21-Jan                                    | 8.45    | 4.25    | 4.97    | 7.97    | p<0.001 | 3.69    | 3.41    | 4.06    | 4.96    | 4.00    | p<0.001 |
| 21-Feb                                    | 8.52    | 3.89    | 4.59    | 6.92    | p<0.001 | 3.57    | 3.23    | 3.70    | 4.57    | 3.76    | p<0.001 |
| 21-Mar                                    | 7.10    | 3.07    | 3.75    | 5.92    | p<0.001 | 2.79    | 2.54    | 2.92    | 3.82    | 2.95    | p<0.001 |
| 21-Apr                                    | 6.57    | 2.82    | 3.58    | 5.41    | p<0.001 | 2.65    | 2.26    | 2.62    | 3.55    | 2.74    | p<0.001 |
| 21-May                                    | 6.33    | 2.65    | 3.35    | 5.17    | p<0.001 | 2.18    | 2.14    | 2.47    | 3.23    | 2.43    | p<0.001 |
| 21-Jun                                    | 5.93    | 2.41    | 3.15    | 4.69    | p<0.001 | 2.17    | 1.98    | 2.32    | 3.13    | 2.21    | p<0.001 |
| Test difference between Feb-20 and Mar-20 | p<0.001 | p<0.001 | p<0.001 | p<0.001 |         | p<0.001 | p<0.001 | p<0.001 | p<0.001 | p<0.001 |         |
| Test difference between Mar-20 and Apr-20 | p<0.001 | p<0.001 | p<0.001 | p<0.001 |         | p<0.001 | p<0.001 | p<0.001 | p<0.001 | p<0.001 |         |
| Test difference between Apr-20 and May-20 | p<0.001 | p<0.001 | p<0.001 | p<0.001 |         | p<0.001 | p<0.001 | p<0.001 | p<0.001 | p<0.001 |         |
| Test difference between May-20 and Jun-20 | p<0.001 | p<0.001 | p<0.001 | p<0.001 |         | p<0.001 | p<0.001 | p<0.001 | p<0.001 | p<0.001 |         |
| Test difference between Feb-20 and Jun-21 | p<0.001 | p<0.001 | p<0.001 | p<0.001 |         | p<0.001 | p<0.001 | p<0.001 | p<0.001 | p<0.001 |         |

Abbreviation: CVD, cardiovascular disease; AMI, acute myocardial infarction; HF, heart failure; IHD, ischemic heart disease; AF, atrial fibrillation

Note: The numbers are the corresponding estimates for Figure 3. For age groups, sex, and urbanicity, the differences between the subgroups in the proportions of telehealth to total outpatient encounters were tested using Welch's 2-tail t-test by each month. For census regions (Northeast, South, Midwest, and West) and sub-CVD diseases (AMI, HF, IHD, stroke, and AF), the differences between the subgroups were tested using one-way ANOVA by each month. The corresponding p-values for the test statistics were reported on the columns right to the comparison groups. The month-to-month changes from February 2020 (the month before the pandemic) to June 2020, and the changes between February 2020 and June 2021 were tested using Welch's 2-tail t-test for all and the subgroups. The corresponding p-values for the test statistics were reported at the bottom of each panel.
